# Supplementary material
Source: PubMed Central journal article supplement (PMC3832700)

HA

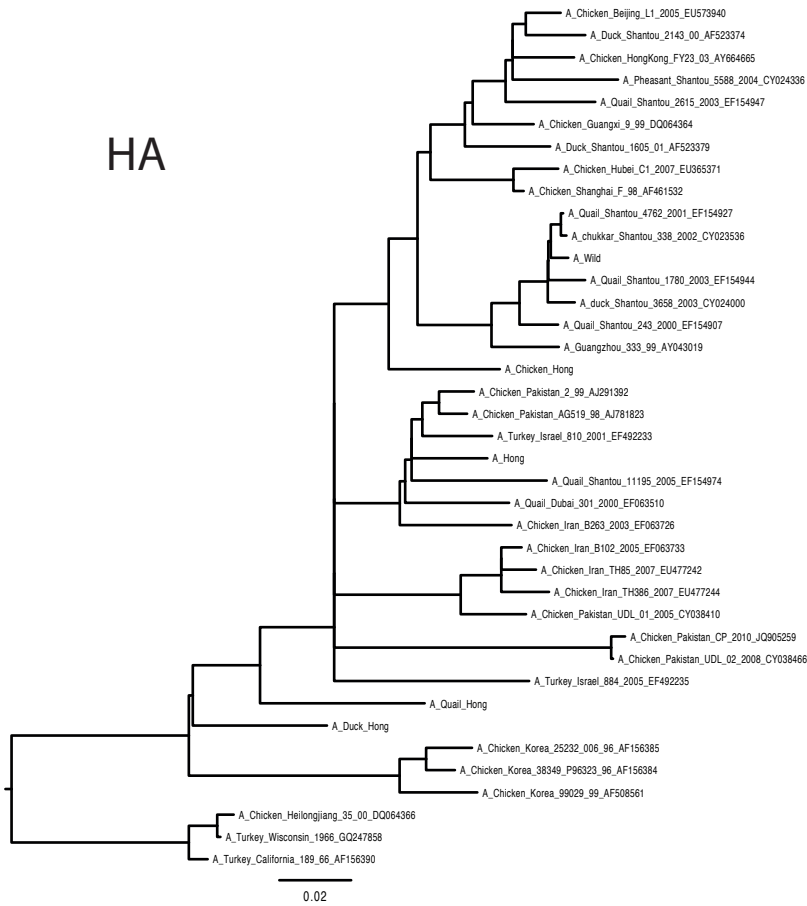

NA

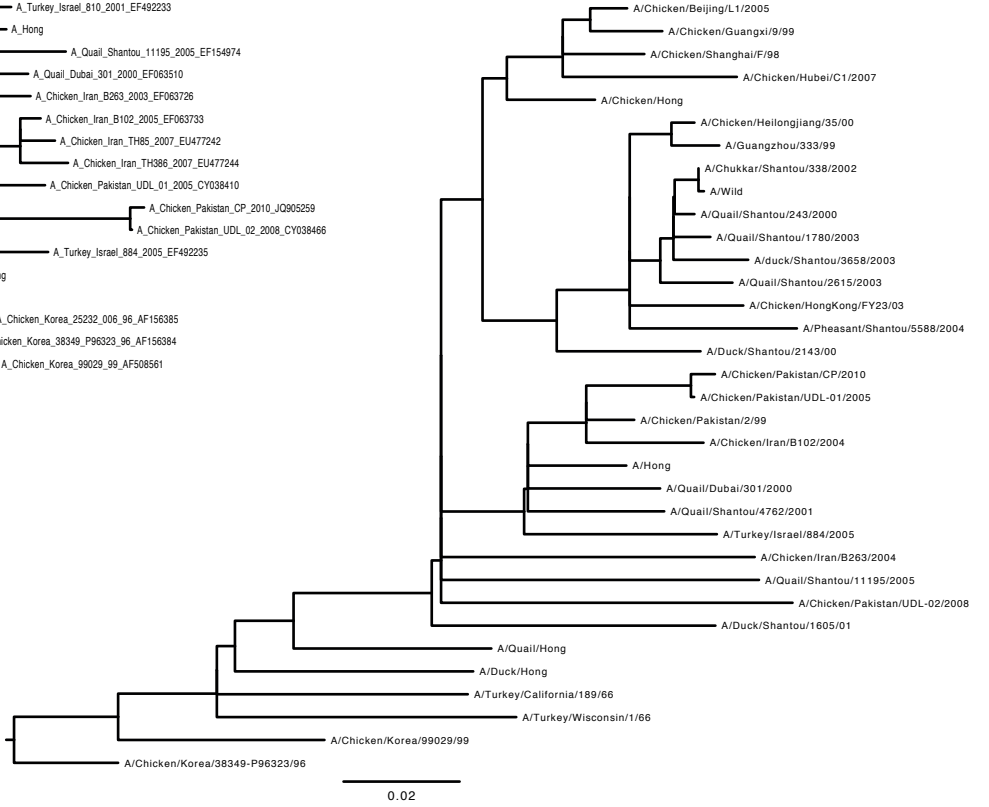

NS1

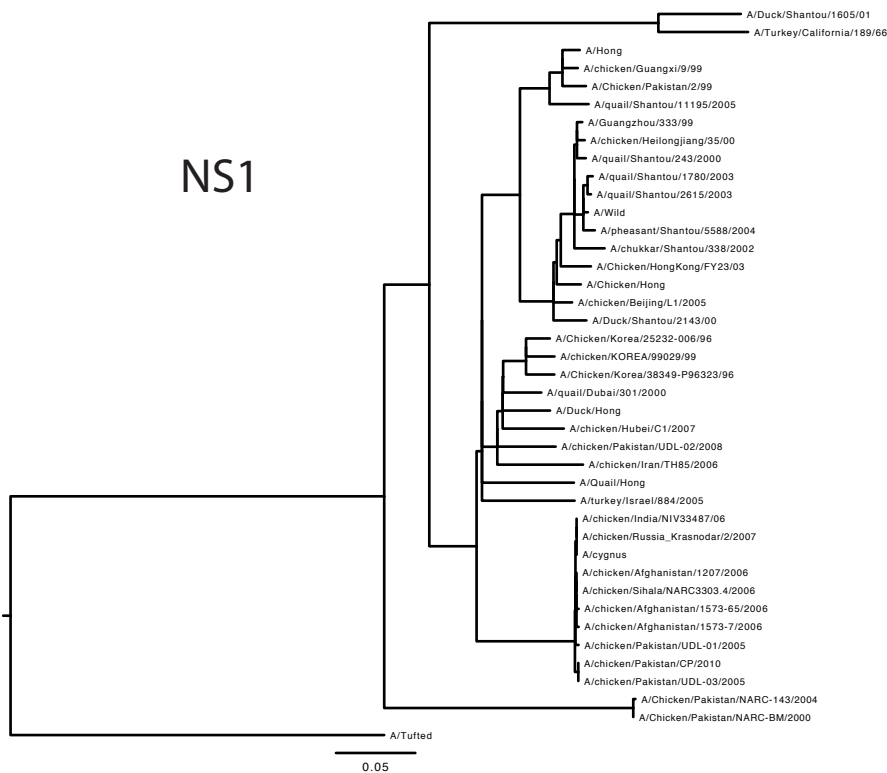

Supplement: 13337_2013_144_MOESM1_ESM.pdf [file 13337_2013_144_MOESM1_ESM.pdf]
